# Supplementary material for: MicroRNA-144 inhibits cell proliferation, migration and invasion in human hepatocellular carcinoma by targeting CCNB1
Source: PubMed Central journal article supplement (PMC6332595; doi:10.1186/s12935-019-0729-x), 2019-01-14
Supplement: 12935_2019_729_MOESM1_ESM.pdf [file 12935_2019_729_MOESM1_ESM.pdf]

| Gene Name | MicroRNA                        | StemLoop ID    | miRanda | miRDB | miRWalk | RNA22 | Targetscan | SUM |
|-----------|---------------------------------|----------------|---------|-------|---------|-------|------------|-----|
| CCNB1     | <a href="#">hsa-miR-496</a>     | hsa-mir-496    | 1       | 1     | 0       | 0     | 1          | 3   |
| CCNB1     | <a href="#">hsa-miR-548h</a>    | hsa-mir-548h-4 | 1       | 1     | 0       | 0     | 1          | 3   |
| CCNB1     | <a href="#">hsa-miR-607</a>     | hsa-mir-607    | 1       | 1     | 0       | 0     | 1          | 3   |
| CCNB1     | <a href="#">hsa-miR-181c</a>    | hsa-mir-181c   | 1       | 1     | 0       | 0     | 1          | 3   |
| CCNB1     | <a href="#">hsa-miR-181b</a>    | hsa-mir-181b-2 | 1       | 1     | 0       | 0     | 1          | 3   |
| CCNB1     | <a href="#">hsa-miR-548c-5p</a> | hsa-mir-548c   | 1       | 1     | 0       | 0     | 1          | 3   |
| CCNB1     | <a href="#">hsa-miR-181d</a>    | hsa-mir-181d   | 1       | 1     | 0       | 0     | 1          | 3   |
| CCNB1     | <a href="#">hsa-miR-548i</a>    | hsa-mir-548i-4 | 1       | 1     | 0       | 0     | 1          | 3   |
| CCNB1     | <a href="#">hsa-miR-548j</a>    | hsa-mir-548j   | 1       | 1     | 0       | 0     | 1          | 3   |
| CCNB1     | <a href="#">hsa-miR-548b-5p</a> | hsa-mir-548b   | 1       | 1     | 0       | 0     | 1          | 3   |
| CCNB1     | <a href="#">hsa-miR-379</a>     | hsa-mir-379    | 1       | 1     | 0       | 0     | 1          | 3   |
| CCNB1     | <a href="#">hsa-miR-548d-5p</a> | hsa-mir-548d-2 | 1       | 1     | 0       | 0     | 1          | 3   |
| CCNB1     | <a href="#">hsa-miR-548n</a>    | hsa-mir-548n   | 1       | 1     | 0       | 0     | 1          | 3   |
| CCNB1     | <a href="#">hsa-miR-520g</a>    | hsa-mir-520g   | 1       | 1     | 0       | 0     | 1          | 3   |
| CCNB1     | <a href="#">hsa-miR-181a</a>    | hsa-mir-181a-1 | 1       | 1     | 0       | 0     | 1          | 3   |
| CCNB1     | <a href="#">hsa-miR-520h</a>    | hsa-mir-520h   | 1       | 1     | 0       | 0     | 1          | 3   |
| CCNB1     | <a href="#">hsa-miR-892b</a>    | hsa-mir-892b   | 1       | 1     | 0       | 0     | 1          | 3   |
| CCNB1     | <a href="#">hsa-miR-548a-5p</a> | hsa-mir-548a-3 | 1       | 1     | 0       | 0     | 1          | 3   |
| CCNB1     | <a href="#">hsa-miR-559</a>     | hsa-mir-559    | 1       | 1     | 0       | 0     | 1          | 3   |
| CCNB1     | <a href="#">hsa-miR-144</a>     | hsa-mir-144    | 1       | 0     | 0       | 0     | 1          | 2   |
