# Supplementary material for: MicroRNA-144 inhibits cell proliferation, migration and invasion in human hepatocellular carcinoma by targeting CCNB1
Source: PubMed Central journal article supplement (PMC6332595; doi:10.1186/s12935-019-0729-x), 2019-01-14
Supplement: 12935_2019_729_MOESM2_ESM.pdf [file 12935_2019_729_MOESM2_ESM.pdf]

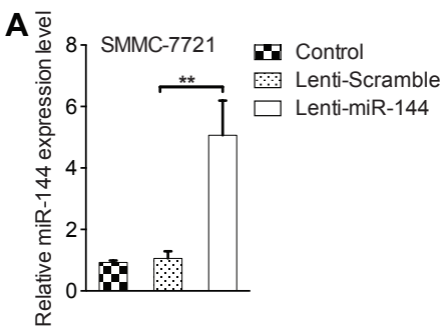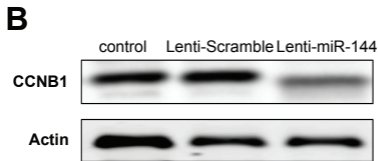

**Additional File 2: Figure S2**
